1 **Front page**

2

3 **Title:**

4 Quantitative systems pharmacology modeling of avadomide-induced neutropenia enables virtual clinical  
5 dose and schedule finding studies

6 **Authors:**

7 Roberto A. Abbiati<sup>1\*</sup>, Michael Pourdehnad<sup>2</sup>, Soraya Carrancio<sup>3</sup>, Daniel W. Pierce<sup>3</sup>, Shailaja Kasibhatla<sup>3</sup>,  
8 Mark McConnell<sup>4</sup>, Matthew W. B. Trotter<sup>1</sup>, Remco Loos<sup>1</sup>, Cristina C. Santini<sup>5</sup>, Alexander V. Ratushny<sup>4\*</sup>

9 **Institutions:**

10 <sup>1</sup>Bristol Myers Squibb, Center for Innovation and Translational Research Europe (CITRE), Seville, Spain

11 <sup>2</sup>Bristol Myers Squibb, San Francisco, CA, USA

12 <sup>3</sup>Bristol Myers Squibb, San Diego, CA, USA

13 <sup>4</sup>Bristol Myers Squibb, Seattle, WA, USA

14 <sup>5</sup>Current affiliation: Roche Pharma Research and Early Development, Pharmaceutical Sciences, Roche  
15 Innovation Center, Basel, Switzerland (Affiliation at the time the work was conducted: Bristol Myers  
16 Squibb, Center for Innovation and Translational Research Europe (CITRE), Seville, Spain)

17 \*Corresponding Authors: roberto.abbiati@bms.com; alexander.ratushnyy@bms.com

18

19

20 **Key words:**

21 Avadomide; CELMoD; neutropenia; QSP; virtual patient.

22

23

## 24 Abstract

25 Avadomide is a cereblon E3 ligase modulator and a potent antitumor and immunomodulatory agent.  
26 Avadomide trials are challenged by neutropenia as a major adverse event and a dose-limiting toxicity.  
27 Intermittent dosing schedules supported by preclinical data provide a strategy to reduce frequency and  
28 severity of neutropenia, however the identification of optimal dosing schedules remains a clinical  
29 challenge.

30 Quantitative Systems Pharmacology (QSP) modeling offers opportunities for virtual screening of efficacy  
31 and toxicity levels produced by alternative dose and schedule regimens, thereby supporting decision-  
32 making in translational drug development.

33 We formulated a QSP model to capture the mechanism of avadomide-induced neutropenia, which  
34 involves cereblon-mediated degradation of transcription factor Ikaros, resulting in a maturation block of  
35 the neutrophil lineage.

36 The neutropenia model was integrated with avadomide-specific pharmacokinetic and pharmacodynamic  
37 models to capture dose-dependent effects. Additionally, we generated a disease-specific virtual patient  
38 population to represent the variability in patient characteristics and response to treatment observed for a  
39 diffuse large B-cell lymphoma trial cohort.

40 Model utility was demonstrated by simulating avadomide effect in the virtual population for various  
41 dosing schedules and determining the incidence of high-grade neutropenia, its duration, and the  
42 probability of recovery to low grade-neutropenia.

43

44

45

46

## 47 Introduction

48 Neutrophils are a major class of white blood cells (1). Neutrophils mature in the bone marrow, move to  
49 and reside in peripheral blood circulation, and migrate to inflamed tissue sites when necessary (2). Here,  
50 neutrophils can degranulate, phagocyte microbes, or release cytokines to amplify inflammatory response  
51 (3). The blood count of neutrophils (absolute neutrophil count or ANC) is a clinical metric for individual  
52 capability to fight infections. Neutropenia is a state of low ANC (4,5), which can occur due to genetic  
53 disorders (e.g., cyclic neutropenia), immune diseases (e.g., Crohn's disease), or may occur as a drug-  
54 induced toxicity (6).

55 IMiDs and CELMoDs are a class of compounds therapeutically active against a number of malignancies.  
56 These therapeutics include thalidomide, lenalidomide, pomalidomide (7) and others currently in clinical  
57 development (e.g., Iberdomide (8)). IMiD/CELMoD compounds bind to cereblon (CRBN) and modulate  
58 the affinity of the cereblon E3 ubiquitin ligase complex (CRL4<sup>CRBN</sup>) to its substrates, thereby favoring  
59 their recruitment, ubiquitination and subsequent proteasomal degradation. Avadomide (CC-122) is a  
60 novel CELMoD being developed for patients with advanced solid tumors, non-Hodgkin lymphoma  
61 (NHL), and multiple myeloma (MM) (9). While research continues towards full elucidation of avadomide  
62 activity, it is known that avadomide drives CRL4<sup>CRBN</sup> interaction with two hematopoietic zinc finger  
63 transcription factors Ikaros (IKZF1) and Aiolos (IKZF3) inducing their degradation. These transcription  
64 factors are known to promote immune cell maturation (10) and normal B- and T-cell function (11).  
65 Avadomide administration is associated with a potent antitumor effect and stimulation of T and NK cells  
66 in diffuse large B-cell lymphoma (DLBCL) patients (12).

67 In a recent phase I trial for avadomide in patients with advanced solid tumors, NHL, or MM (Trial  
68 Identifier: NCT01421524), 85% of patients experienced treatment-emergent Grade 3/4 adverse events,  
69 primarily neutropenia, followed by infections, anemia, and febrile neutropenia (13). Clinical management  
70 of neutropenia includes adjunct therapies to stimulate neutrophil production (e.g., administration of  
71 granulocytic-colony stimulating growth factor (G-CSF) as filgrastim), dose-reduction, or treatment  
72 discontinuation. Another approach to manage avadomide-induced neutropenia is the introduction of an  
73 intermittent dosing schedule. For example, 5 days on- followed by 2 days off-treatment (5/7 schedule)  
74 improved tolerability and reduced frequency and severity of neutropenia, febrile neutropenia, and  
75 infections (13).

76 In this context, quantitative systems pharmacology (QSP) modeling offers opportunities for *in silico*  
77 exploration of alternative dose and schedules that maximize drug exposure while allowing for toxicity  
78 management. Such a QSP tool is much needed because CELMoDs are a large and growing family of  
79 compounds and many CELMoDs developed to date share similar patterns of toxicity.

80 Several authors have published mathematical models of neutrophil maturation and neutropenia state,  
81 readers are encouraged to read the review by Craig (14). Some shared characteristics emerge among  
82 differential equation based models: (i) the presence of a proliferative neutrophil progenitor pool (15), (ii)  
83 sequential maturation stages in bone marrow followed by egress into peripheral blood, (iii) fixed life span  
84 of neutrophils in circulation, and (iv) some form of control mechanism that regulates neutrophil level  
85 (16–18). Further papers highlight the existence of a reservoir pool of mature neutrophils in bone marrow  
86 (19,20) and of a marginated pool of neutrophils (consisting of neutrophils localized in sites other than  
87 bone marrow and peripheral blood that are able to relocate) (21,22).

88 Here, we develop a QSP model to represent avadomide-induced neutropenia and we apply it to predict the  
89 incidence and the severity of neutropenic events in a virtual DLBCL (diffuse large B-cell lymphoma)  
90 population across a range of dosing schedules to demonstrate its potential utility.

91 The model development followed relevant good practice guidelines (23,24) and included verification of  
92 model structural identifiability (25–27), global sensitivity analysis (28) and model validation (29).

93

94

## 95 Methods

96 This section details technical and methodological aspects of model implementation.

### 97 ODE based models

98 The models for avadomide-pharmacokinetics (PK) and neutrophil life cycle are ordinary differential  
99 equation (ODE) based and were integrated using Matlab R2020a ODE routines (30). For model fit we  
100 applied the optimization routine *fminsearch* (31) to minimize an objective function consisting in the  
101 weighted sum of absolute normalized difference between model simulation and experimental data.

### 102 Model structural identifiability and global sensitivity analysis

103 Structural identifiability verifies that, given the proposed model structure, it is possible to regress a unique  
104 set of model parameters (globally or locally) under the hypothesis of ideal data (noise-free and  
105 continuously sampled) (32). This test was conducted in Matlab using the GenSSI 2.0 package (33–35).

106 Sensitivity analysis (SA) allows exploration of model input-output structure and supports model  
107 development. Global SA (GSA) enables a broad exploration of parameter space. We adopted a Monte  
108 Carlo based method as described in (36) (Supplementary Material 1.1).

### 109 Virtual patient population

110 To represent the heterogeneity of ANC data observed in the clinical trial, we generated virtual patients  
111 representing clinical disease-specific cohorts. A virtual patient consists of a neutrophil life cycle model  
112 for which selected parameters are assigned from probability functions determining the expected  
113 parameter distributions for patients having a given tumor type (e.g., Glioblastoma (GBM) or DLBCL).  
114 These probability distribution functions are generated by repeated model fit to individual clinical ANC  
115 data, thereby estimating the parameter value empirical distributions. These distributions are tested for  
116 normality by applying the Anderson-Darling test (*adtest*, Matlab) and smoothed adopting a kernel density  
117 estimation (*ksdensity*, Matlab).

### 118 Model validation

119 For validation, the model simulations were compared to clinical datasets that were not used during the  
120 virtual population development. The comparison was based on a two-sample Kolmogorov-Smirnov (K-S)  
121 test. This statistical test determines if the empirical distributions of two sample sets belong to the same  
122 distribution. Here, the two sample sets are the model generated ANC and clinical ANC taken at the same  
123 time after avadomide administration. This test was executed in Matlab using the *kstest2* function.

### 124 Estimation of toxicity

125 The final goal of the simulation is the quantification of neutropenia incidence for a given avadomide  
126 dosing schedule in a virtual patient population. We focused on neutropenia and did not develop an  
127 efficacy-pharmacodynamic (PD) model for tumor suppression. We adopted drug level (e.g., Area-Under-  
128 the-Curve or AUC in central compartment of the PK model) as surrogate endpoint for efficacy, assuming  
129 direct proportionality between exposure and efficacy. This is contrasted to neutropenia based on the  
130 following parameters: (i) toxicity event (i.e., occurrence of any neutropenic event), (ii) seven-day toxicity  
131 event (i.e., neutropenic event lasting for at least 7 consecutive days), (iii) recovery from neutropenia (i.e.,  
132 recovery to Grade 1, meaning at least one ANC measure above Grade 2 threshold after a toxicity event),  
133 (iv) time to recover (i.e., time between first toxicity onset and first subsequent ANC above Grade 2). The  
134 toxicity events considered were neutropenia Grade 3 (ANC below  $1E9$  neutrophil/liter) and Grade 4  
135 (ANC below  $5E8$  neutrophil/liter). The evaluation of seven-day neutropenia is preferred since Grade 4  
136 neutropenia lasting 7 days or more is a dose limiting toxicity by protocol. Simulation analysis was limited  
137 to the first treatment cycle (28 days).

138

139

140

## 141 Results

### 142 Neutrophil life cycle model captures main stages of neutrophil maturation

143 The QSP workflow is shown in Figure 1A. It integrates three modules (i.e., PK, PD, neutrophil life cycle)  
144 and accessory operations (e.g., definition of virtual patients, model validation).

145 The neutrophil life cycle model (Figure 1B, Equations 1-8) describes neutrophil formation and maturation  
146 processes in bone marrow hematopoietic space, neutrophil egress from bone marrow to peripheral blood  
147 circulation, and neutrophil terminal death. The model consists in a proliferation pool (Proliferation), with  
148 proliferation rate  $k_{prol}$ ; a sequence of maturation stages (Transit 1, 2, 3) with sequential, first-order  
149 transfers and rate constants  $k_{tr,1}$ ,  $k_{tr,2}$ ,  $k_{tr,3}$ ,  $k_{tr,4}$ ; a reservoir pool (Reservoir) of mature neutrophils stored in  
150 bone marrow and final release to peripheral blood (Circulation). Bone marrow egress is controlled by the  
151  $k_{out}$  rate constant. Finally, circulating neutrophils are subjected to terminal death based on  $k_{elim}$  rate, while  
152 maturing neutrophils undergo apoptosis based on  $k_d$  rate constant.

153 The model formulation was adapted to capture the specificity of the avadomide mechanism of action and  
154 to acknowledge the role of Ikaros upon neutrophil maturation. The  $k_{tr,3}$  expression was modified into a  
155 Michaelis-Menten based functional form ( $k_{tr,3} = \frac{V_{max}}{K_M + Transit_2}$ , in Equations 3-4). The model includes two  
156 regulatory feedback mechanisms of neutrophil maturation under perturbed conditions: Feedback  
157 Proliferation (Equation 7) modulates the proliferation rate based on Transit 2 level and Feedback Egress  
158 (Equation 8) regulates egress of neutrophils from reservoir pool to peripheral blood. Both feedback  
159 mechanisms have a similar functional form, the exponents ( $\gamma$  and  $\beta$ ) modulate the velocity of the control  
160 action. For full details of model formulation refer to Supplementary Materials 2.1.

### 161 Avadomide PK and PD models

162 The avadomide PK is described by a two-compartment PK model. The avadomide PD model (Equation  
163 9) determines the magnitude of neutrophil maturation block as a function of avadomide concentration  
164 (details in Supplementary Materials 2.2).

### 165 Clinical trial data show high inter- and intra-disease cohort variability in 166 longitudinal ANC patterns

167 We conducted a preliminary data analysis to explore patterns of longitudinal ANC profiles for the first  
168 treatment cycle (Figure 2) across and within disease cohorts and dosing groups. This analysis revealed a  
169 significant variability in the longitudinal ANC profiles that associated with both initial patient  
170 characteristics (e.g., baseline ANC measures from  $\sim 2E9$  to  $8E9$  cell/liter, Figure 2A) and treatment dosing  
171 schedules (normalized nadir depth varies within the same disease cohort for different dosing schedules,  
172 Figure 2C). These results emphasize the need to generate disease-specific models and the importance of  
173 capturing patient variability within individual cohorts.

### 174 Model parameterization explains disease cohort differences in ANC patterns

175 Model parameterization involved a combination of literature information, experimental observations,  
176 calculation, and regression.

177 Because the neutrophil life cycle model (detailed in Supplementary Material 2.1) has a unidirectional and  
178 sequential transit compartment structure, most of the parameters can be calculated given one of these  
179 transit rates. We informed  $k_{elim}$  from literature and fixed  $k_d$  to a minor/negligible rate (as detailed below),  
180 and backward calculated  $k_{out}$ ,  $k_{tr,4}$ ,  $k_{tr,3}$ ,  $k_{tr,2}$ ,  $k_{tr,1}$ ,  $k_{prol}$  under the assumption of homeostasis (i.e., cell count  
181 remain constant in all compartments). Calculation details are shown in Table I.

182 The half-life of circulating neutrophils in humans is subject of discussion. Several publications report  
183 contrasting data (21,37–39), proposing that half-life could range from a few hours to several days.  
184 Difficulty in measuring this parameter depends mostly on the cell-labeling system adopted and to the fact  
185 that neutrophils can relocate to marginated sites thereby affecting apparent circulating half-life estimates.  
186 Furthermore, neutrophil life-span can change under non-homeostatic conditions (39). In particular, Dale  
187 *et al.* (40) reported that under neutropenic state, neutrophil life span doubles ( $t_{1/2} = 9.6$  h control vs 20.3 h  
188 neutropenia state). Given this knowledge and because the majority of papers report half-life ranging from  
189 4 to 18 h (39), with a recent report measuring 3.8 days (41), we choose a typical value of 15 h and we

190 double it to 30 h in agreement with enhanced life-span for neutropenia disease state. Finally, because all  
 191 transit parameters are related, the choice of a different  $t_{1/2}$  within this range would not lead to significant  
 192 changes in model outputs.

193 For initial cell count in the model compartments, because it was not possible to determine neutrophil cell  
 194 concentration in the human hematopoietic tissue *in vivo*, we adopted the same approach of Friberg et al.  
 195 2002 (16) and fixed the initial cell level in all compartments (excluding the Reservoir component) to the  
 196 initial neutrophil concentration in blood.

197 Remaining parameters were regressed or fixed to constant values. Regressed parameters include: the  
 198 exponent of the Feedback Proliferation function ( $\gamma$ ); the initial cell level in the reservoir pool (expressed  
 199 as the ratio of cell level in the reservoir pool divided by cell level in Circulation, or  $Ratio_{Reserv0/Circ0}$ ), and  
 200  $K_M$  (in the following expressed as fraction of the initial cell level in Transit2 compartment, or  $K_{M, fraction}$ ).  
 201 These parameters allow modulation of neutropenia patterns in different disease cohorts (e.g., GBM or  
 202 DLBCL patients) or across individual patients and are discussed below. Fixed parameters are  $k_d$  and  $\beta$ .  $k_d$   
 203 was introduced above as a maturing cell death rate. The *in vitro* maturation assay showed that avadomide  
 204 induces a reversible maturation block with no significant change in cell viability. However, apoptosis of  
 205 maturing cells is a biologically recognized process and it is possible to speculate that *in vivo* neutrophils  
 206 undergoing long term maturation block may experience enhanced apoptosis. Based on this, we included  
 207 this process in the model with an arbitrarily assigned small rate (i.e.,  $0.001 \text{ h}^{-1}$  or  $\sim 4\%$  of  $k_{tr}$  maturation  
 208 rates departing from the same compartments). The parameter  $\beta$  controls egress rate from the bone marrow  
 209 reservoir pool. The biological mechanism controlling neutrophil egress from bone marrow is complex and  
 210 only partially understood (42). We fixed  $\beta$  to a high value based on the clinical observation that, even in  
 211 presence of avadomide block, circulating ANC was stably maintained at baseline level for several days  
 212 despite compromised bone marrow maturation, suggesting that the egress of mature neutrophils from  
 213 bone marrow is sustained and prompt.

214 *Table I. Model parameters for avadomide PD and neutrophil life cycle (median) model for GBM, DLBCL, and MM.*  
 215 *Type column refers to parameter assignment: A=assigned from literature or fixed arbitrarily; C=computed based on*  
 216 *equation reported in the Details column; R=regressed.*

| Parameter               | Type                    | Value GBM  | Value DLBCL | Value MM   | Unit   | Details                                                      |
|-------------------------|-------------------------|------------|-------------|------------|--------|--------------------------------------------------------------|
| $EC_{50,PD}$            | R                       | 15         | 15          | 15         | ng/ml  | Regressed by fitting model to GBM clinical ANC               |
| $n_{PD}$                | R                       | 2          | 2           | 2          | -      | Regressed by fitting model to GBM clinical ANC               |
| $E_{max,PD}$            | A                       | 0.9        | 0.9         | 0.9        | -      | Fixed                                                        |
| $\gamma$                | R                       | 0.02       | 0.01        | 0.017      | -      | Regressed by fitting model to respective cohort ANC data     |
| $\beta$                 | A                       | 20         | 20          | 20         | -      | Fixed                                                        |
| $Circ_0$                | A <sub>input</sub>      | 4.5E9 *    | 4.5E9 *     | 4.5E9 *    | cell/l | Assigned based on clinical probability distribution function |
| $t_{1/2,Neutrophils}$   | A <sub>literature</sub> | 30         | 30          | 30         | h      | Literature (see Model parameterization section for details)  |
| $k_{elim}$              | C                       | 0.0231     | 0.0231      | 0.0231     | 1/h    | $\ln(2)/t_{1/2,Neutrophils}$                                 |
| $k_d$                   | A                       | 0.001      | 0.001       | 0.001      | 1/h    | Fixed                                                        |
| $Ratio_{Reserv0/Circ0}$ | R                       | 3          | 2.5         | 2.5        | -      | Regressed by fitting model to respective cohort ANC data     |
| $Reserv_0$              | C                       | 1.35E10 ** | 1.25E10 **  | 1.25E10 ** | cell/l | $Ratio_{Reserv0/Circ0} \cdot Circ_0$                         |
| $Tran_0, Prol_0$        | C                       | 4.5E9 **   | 4.5E9 **    | 4.5E9 **   | cell/l | $Circ_0$                                                     |
| $k_{out}$               | C                       | 0.0077 **  | 0.0092 **   | 0.0092 **  | 1/h    | $k_{elim} \cdot Circ_0 / Reserv_0$                           |
| $k_{tr4}$               | C                       | 0.0261 **  | 0.0256 **   | 0.0256 **  | 1/h    | $(k_d \cdot Reserv_0 + k_{out} \cdot Reserv_0) / Tran_0$     |
| $k_{tr3}$               | C                       | 0.0271 **  | 0.0266 **   | 0.0266 **  | 1/h    | $(k_d \cdot Tran_0 + k_{tr4} \cdot Tran_0) / Tran_0$         |

|                   |   |            |            |            |          |                                                          |
|-------------------|---|------------|------------|------------|----------|----------------------------------------------------------|
| $k_{tr2}$         | C | 0.0281 **  | 0.0276 **  | 0.0276 **  | 1/h      | $(k_d \cdot Tran_0 + k_{tr3} \cdot Tran_0) / Tran_0$     |
| $k_{tr1}$         | C | 0.0291 **  | 0.0286 **  | 0.0286 **  | 1/h      | $(k_d \cdot Tran_0 + k_{tr2} \cdot Tran_0) / Prol_0$     |
| $k_{prot}$        | C | 0.0291 **  | 0.0286 **  | 0.0286 **  | 1/h      | $k_{tr1}$                                                |
| $K_{M, fraction}$ | R | 0.6        | 0.1        | 0.45       | -        | Regressed by fitting model to respective cohort ANC data |
| $K_M$             | C | 2.7E9 **   | 4.5E8 **   | 2.015E9 ** | cell/l   | $Tran_0 * K_{M, fraction}$                               |
| $V_{max}$         | C | 1.952E8 ** | 1.317E8 ** | 1.736E8 ** | cell/l/h | $k_{tr3} \cdot (K_M + Tran_0)$                           |

\* example of typical ANC value, during simulations this parameter is virtual patient specific.

\*\* example of parameter values based on formulas and  $Circ_0$  value.

217

218 The model was initially fitted to data from GBM patients. Those patients did not receive previous lines of  
 219 bone marrow depleting treatments and therefore represent the closest match to a healthy bone marrow  
 220 condition before avadomide treatment. The model was fit simultaneously to all GBM dose groups in  
 221 order to regress a single parameter set representative of the GBM patient population ( Figure 3A). At this  
 222 step, five parameters were fitted. Three of those parameters are disease-group specific:  $\gamma$ ,  $Ratio_{Reserv0/Circ0}$ ,  
 223  $K_{M, fraction}$ , and two are PD specific:  $EC_{50, PD}$  and  $n_{PD}$ . Once regressed, PD parameters are kept constant for  
 224 any other avadomide simulation/fit under the assumption that drug effect is reproducible across the  
 225 disease cohorts. The three disease-group specific parameters are instead re-fitted per disease group,  
 226 because these parameters are representative for the bone marrow state and thus change across disease  
 227 cohorts.

228 For model fit to the DLBCL median profiles (i.e., gray dotted lines in Figure 3B), the parameters  $\gamma$ ,  
 229  $Ratio_{Reserv0/Circ0}$ ,  $K_{M, fraction}$  were refitted starting from the GBM estimate as initial guess. This operation  
 230 served multiple purposes: (i) determine typical parameter values of DLBCL patients, (ii) explore whether  
 231 parameter value differences between GBM and DLBCL could explain biological differences between the  
 232 two patient groups, and (iii) determine initial parameter estimates for the subsequent step of patient-  
 233 specific model fits.

234 Figure 3B shows a model fit to median DLBCL ANC data and Table I compares fitted parameter values  
 235 for GBM vs DLBCL. It can be observed that parameters representing size of mature neutrophil reservoir  
 236 pool in bone marrow (i.e.,  $Ratio_{Reserv0/Circ0}$ ), extent of proliferative response to avadomide maturation  
 237 block (i.e.,  $\gamma$ ), and idiosyncratic capacity to contrast maturation block (i.e.,  $K_{M, fraction}$ ) are reduced in  
 238 DLBCL compared to GBM.

239

240

## 241 Virtual patient cohort

242 The following four model parameters allow for characterization of individual patients: (i) ANC level at  
 243 baseline, (ii) size of the neutrophil reservoir pool in the bone marrow, (iii)  $K_M$  parameter in the Michaelis-  
 244 Menten formulation of  $k_{tr,3}$ , and (iv)  $\gamma$  exponent in the Feedback Proliferation function. Briefly, the ANC  
 245 level at baseline is the neutrophil count in blood before treatment start. The size of the neutrophil  
 246 reservoir pool represents individual initial level of mature neutrophils stored in bone marrow at treatment  
 247 start (it influences the time needed before a drop in circulating ANC is observed). The  $K_M$  parameter  
 248 regulates changes to neutrophil transfer from Transit 2 to Transit 3 when Transit 2 cell level deviates from  
 249 its homeostatic value. The  $\gamma$  exponent controls the magnitude of proliferative response to the avadomide-  
 250 induced perturbation of neutrophil maturation.

251 Starting from the DLBCL reference parameter set, the model was re-fitted to individual ANC profiles in  
 252 the DLBCL cohort, thereby generating a set of values for each parameter. Because not all parameter value  
 253 distributions are normal, we kept the parameter empirical distributions as they are (i.e., without replacing  
 254 them with parametric models) and adopted kernel density estimation to estimate the probability density  
 255 function (Figure 4A).

256 Finally, virtual patients were created by independent random sampling from the parameter value  
257 probability distribution functions (parameter values are assumed independent, meaning that there is no  
258 conditional probability for parameter values given the value of other parameters). The virtual cohorts  
259 generated for this analysis included 1,000 virtual patients (Figure 4B).

260

## 261 Model identifiability and global sensitivity analyses

262 The model was tested for identifiability considering the three individualized parameters ( $\gamma$ ,  $K_{M, fraction}$ ,  
263  $Ratio_{Reserv0/Circ0}$ ) and specifying that observations are only available for Circulation compartment.  $K_{M, fraction}$   
264 and  $Ratio_{Reserv0/Circ0}$  are globally structurally identifiable, while  $\gamma$  is locally identifiable.

265 We used GSA to rank parameters by importance in determining changes to the simulated ANC profile  
266 (full results in Supplementary Materials 2.4). GSA results support the choice of  $\gamma$  and  $Ratio_{Reserv0/Circ0}$  as  
267 individual parameters for the generation of the virtual patient population, while indicate that  $K_{M, fraction}$  is  
268 likely to contribute poorly toward differentiating virtual patients. For the present application, we  
269 acknowledge the minor role of this parameter, which could nonetheless be relevant for model application  
270 in the context of other indications and it is therefore kept in the virtual patient generation workflow.

271

272

## 273 Virtual population of DLBCL patients reproduces clinically observed 274 longitudinal ANC profiles

275 The virtual DLBCL patient population was validated by simulating the same treatment received by two  
276 clinical trial cohorts (avadoamide 3 mg on a 5/7 and QD schedule, data not used to generate the virtual  
277 population) and then testing equivalence of the virtual and the clinical ANC distributions at selected  
278 times. Figure 5 shows how these distributions were found being equivalent at all tested times for the 3mg  
279 QD group and for 4 of 5 times for the 3mg 5/7 group.

280

## 281 Model is applied to explore doses and schedules

282 Avadoamide administration to the virtual DLBCL cohort (1000 virtual patients) was simulated for all  
283 combinations of 7 doses (i.e., 2, 3, 4, 5, 6, 7, 8 mg) and 6 schedules (i.e., 3/7, 5/7, 7/14, 14/28, 21/28,  
284 28/28), totaling 42,000 simulations. Next, individual predictions of ANC profiles were processed to  
285 determine whether or not avadoamide caused Grade 3 or 4 neutropenia, its duration, the recovery, and the  
286 time to recover. Collective analysis determined the percentage of patients expected to experience toxicity  
287 and possibly recover from it within the first drug administration cycle. Here we report a selection of  
288 representative results, full results available in Supplementary Materials 2.5.

289 Figure shows the longitudinal ANC profiles for the same virtual cohort receiving 6 mg of avadoamide  
290 on the 5/7 or 21/28 schedule. In terms of exposure, the two schedules allow similar total dosing and PK  
291 exposure over the first cycle (20 doses and 1417 ng/ml\*h  $AUC_{cycle1}$  vs 21 doses and 1515 ng/ml\*h  
292  $AUC_{cycle1}$ , for schedules 5/7 and 21/28 respectively). Simulations show that until exhaustion of the  
293 reservoir pool, the ANC level remains stable, whereas at later time points (typically after day 10 post  
294 administration) ANC start dropping towards neutropenic levels. The schedule 5/7 shows that ANC nadir  
295 is reached for most virtual patients by day 21 with very few Grade 4 events, typically of short duration  
296 (~3 days). Virtual patients on the 21/28 schedule are shown to reach neutrophil count very proximal to  
297 absolute nadir by day 15 with a higher portion of patients experiencing Grade 4 neutropenia. Furthermore,  
298 ANC profiles for the 21/28 schedule are maintained proximal to nadir for several days, however the 7-day  
299 dose interruption enable a substantial recovery to level proximal to baseline. In both scenarios, ANC  
300 longitudinal profiles are tightly bound to dosing schedule.

301 Table II shows incidence of high-grade neutropenia and recovery for (i) different schedules at the same  
302 dose (4 mg) and for (ii) same schedule at different doses (5/7, 2 to 8 mg).

303



304 *Table II. Summary of simulation results for different avadomide dosing schedules in virtual DLBCL cohort.*  
 305 *A: multiple schedules for an avadomide 4 mg dose. B: different doses of avadomide given by a 5/7 schedule. Gr3*  
 306 *(Grade 3) and Gr4 (Grade 4) single indicate percentage of virtual patients experiencing at least one event of*  
 307 *neutrophil level below the respective toxic threshold. Gr3 and Gr4 7 days indicate the percentage of virtual patients*  
 308 *experiencing extended and uninterrupted Grade 3 and 4 toxicity, respectively, for at least 7 consecutive days.*  
 309 *Recovered Gr3 to above Gr2 and Gr4 to above Gr2 indicate the percentage of patients that recovered to Grade 1*  
 310 *(i.e., above Grade 2). Analysis is limited to the first treatment cycle.*

|                      | Gr3<br>single<br>[%]                                                  | Gr4<br>single<br>[%] | Gr3<br>7 days<br>[%] | Gr4<br>7 days<br>[%] | Recovered<br>Gr3 to<br>above Gr2<br>[%] | Recovered<br>Gr4 to<br>above Gr2<br>[%] | Mean time<br>to recover<br>from<br>Gr3 to<br>above Gr2<br>[day] | Mean time<br>to recover<br>from<br>Gr4 to<br>above Gr2<br>[day] | AUC<br>[ng/ml*h] | C <sub>max</sub><br>[ng/ml] |
|----------------------|-----------------------------------------------------------------------|----------------------|----------------------|----------------------|-----------------------------------------|-----------------------------------------|-----------------------------------------------------------------|-----------------------------------------------------------------|------------------|-----------------------------|
| <b>Sche<br/>dule</b> | <b>A. Multiple schedules for avadomide 4 mg dose</b>                  |                      |                      |                      |                                         |                                         |                                                                 |                                                                 |                  |                             |
| 3/7                  | 5.3                                                                   | 0                    | 1                    | 0                    | 0                                       | 0                                       |                                                                 |                                                                 | 571              | 91                          |
| 5/7                  | 25.9                                                                  | 3.9                  | 8.9                  | 0                    | 0                                       | 0                                       |                                                                 |                                                                 | 945              | 96                          |
| 7/14                 | 19                                                                    | 2.6                  | 3.3                  | 0                    | 12.5                                    | 0                                       | 4.67                                                            |                                                                 | 672              | 96                          |
| 14/28                | 33.7                                                                  | 5.9                  | 9                    | 0.5                  | 28                                      | 1.4                                     | 6.26                                                            | 9.51                                                            | 676              | 98                          |
| 21/28                | 45.4                                                                  | 9.2                  | 36.6                 | 6.8                  | 38.5                                    | 2.4                                     | 11.24                                                           | 11.71                                                           | 1010             | 98                          |
| 28/28                | 45.9                                                                  | 9.6                  | 45.6                 | 9.1                  | 0                                       | 0                                       |                                                                 |                                                                 | 1303             | 98                          |
| <b>Dose<br/>[mg]</b> | <b>B. Multiple doses for avadomide on 5/7 administration schedule</b> |                      |                      |                      |                                         |                                         |                                                                 |                                                                 |                  |                             |
| 2                    | 5.5                                                                   | 0                    | 2.7                  | 0                    | 0                                       | 0                                       |                                                                 |                                                                 | 472              | 48                          |
| 3                    | 13.5                                                                  | 0.2                  | 5.4                  | 0                    | 0                                       | 0                                       |                                                                 |                                                                 | 709              | 72                          |
| 4                    | 25.9                                                                  | 3.9                  | 8.9                  | 0                    | 0                                       | 0                                       |                                                                 |                                                                 | 945              | 96                          |
| 5                    | 36.7                                                                  | 6.5                  | 13.2                 | 0.2                  | 1                                       | 0                                       | 2.69                                                            |                                                                 | 1181             | 119                         |
| 6                    | 45.8                                                                  | 9.6                  | 20.4                 | 1.8                  | 0.8                                     | 0                                       | 2.74                                                            |                                                                 | 1417             | 143                         |
| 7                    | 53.9                                                                  | 12.4                 | 27.3                 | 4.1                  | 0.5                                     | 0                                       | 2.43                                                            |                                                                 | 1653             | 167                         |
| 8                    | 59.7                                                                  | 15.7                 | 33.7                 | 5.4                  | 0                                       | 0                                       |                                                                 |                                                                 | 1889             | 191                         |

311

312 Based on Table IIA, drug exposure (measured as AUC) increases with the total number of dosing days  
 313 while C<sub>max</sub> increases with the number of consecutive dosing days. For neutropenia, the incidences of both  
 314 Grade 3 and 4 neutropenic events increase with consecutive dosing days, with the exceptions of 5/7 which  
 315 shows slightly higher incidence than 7/14. In contrast the incidence is not directly dependent to the total  
 316 dose received, as shown by the differences between 7/14 vs 14/28 or 5/7 vs 21/28. Interestingly, incidence  
 317 of Grade 3 and 4 events is very similar for schedules 21/28 and 28/28. In contrast, this similarity is not  
 318 found for neutropenia maintained for at least seven consecutive (7+) days, where we observe a substantial  
 319 difference between schedules 21/28 and 28/28 which show incidence of 36.6%, and 45.6% (for Grade 3,  
 320 7+ days), respectively. For 28/28 single and 7+ day, neutropenia has same total incidence, while  
 321 intermittent schedules show a reduction of 7+ neutropenic events compared to single events. In terms of  
 322 recovery, all the intermittent schedules with at least 7 days of dose interruption show substantial recovery  
 323 (i.e., 66% (12.5/19), 83% (28/33.7), and 84% (38.5/45.4) of virtual patients that experienced neutropenia  
 324 Grade 3 recovered above Grade 2 for 7/14, 14/28, and 21/28, respectively). In contrast, no recovery was  
 325 determined for 3/7 and 5/7 schedules. For schedules that allow recovery, the recovery time increases non-  
 326 linearly with consecutive dosing days (i.e., 4.7, 6.3, and 11.2 days were necessary on average to recover  
 327 from Grade 3 to above Grade 2 for schedules 7/14, 14/28, and 21/28, respectively).

328 Based on Table IIB, both AUC and C<sub>max</sub>, increase linearly with the dose. For neutropenia, the incidences  
 329 of both Grade 3 and 4 neutropenic events increase less than proportionally with dose (rapid relative  
 330 increase of neutropenia incidence at low doses and reduced relative increase at high doses). It is also  
 331 observed that, on a 5/7 schedule, there is very little, or absent, recovery at all doses. For the very few  
 332 patients that would recover from neutropenia, the recovery time is short and compatible with the dosing  
 333 interruption interval.

334 Figure 7 shows a bar plot comparison of toxicity and recovery across schedules for two doses (4 or 6 mg),  
 335 to complement the results proposed in Table II. Bars are schedule-specific and are ordered by increasing

336 drug exposure. The higher the number of consecutive dosing days the higher the percentage of patients  
337 experiencing toxicity. This pattern is not verified for 5/7 vs 7/14 likely because of the combined effect of  
338 similar dosing days (5 vs 7 days) and the difference in the dosing holiday (2 vs 7 days). Recovery from  
339 Grade 3 is substantial (>80%) and very similar for 14/28 and 21/28 and increases with dose for schedules  
340 7/14 and 14/28, but not for 21/28. Increase in dose from 4 to 6 mg associates with higher recovery from  
341 Grade 4. Schedule 5/7 shows some lower toxicity compared to other schedules but offers little or no  
342 recovery.

343 Figure 8 shows the time of nadir for five different schedules. Schedule 5/7 shows bimodal time of nadir  
344 with ~9% of patients having nadir at day 20 and ~91% at day 27. Schedule 7/14 and 21/28 show nadir at  
345 day 21, consistently with the start of the latest dosing holiday for cycle 1. Schedule 14/28 shows nadir in  
346 the interval of day 15 to 17. Finally, daily dosing (schedule 28/28) results in progressive increase of the  
347 virtual patients having ANC nadir in the interval of day 21 to day 28.

348

349

## 350 Discussion

351 In this paper we have presented a QSP model for avadomide induced neutropenia. We applied this model  
352 to virtually explore the pattern and the incidence of neutropenia across dosing schedule scenarios in a  
353 DLBCL patient population treated with avadomide. Model development followed good practice standards  
354 as described in Bai et al. 2019 (23).

355 The neutrophil life cycle model developed describes neutrophil maturation and transit stages from bone  
356 marrow to peripheral blood and captures the avadomide-specific mechanism of induction of neutropenia.  
357 Since this mechanism is different from chemotherapy-induced neutropenia, published models (such as the  
358 Friberg model (16)) could not be applied to address needs of our study. A major difference of our model  
359 compared to the Friberg model (16) is that proliferation rate is not controlled by ANC level changes  
360 compared to baseline in peripheral blood. That mechanistic implementation was not well-suited to  
361 description of the CELMoD-driven neutrophil maturation block, and upon testing produced indefinite  
362 accumulation of neutrophils at the maturation blocked stage and excessive proliferation (because during  
363 maturation block, proliferation would be continuously stimulated by the sub-baseline ANC level).  
364 Additionally, a first order modeling of the cell transit through maturation stages is not suitable for  
365 CELMoD-like maturation block. For example, the first order based transit (i.e., rate constant\*cell level in  
366 upstream compartment) in presence of CELMoD-depressed maturation rate constant results in  
367 accumulation of cells at the affected maturation stage, which eventually would mathematically  
368 compensate for rate constant reduction and ultimately cause net flow to overcome the maturation block.  
369 Accordingly, we adopted a Michaelis-Menten like function for Transit stage 2 which allowed an  
370 asymptotic behavior of the flow out of Transit 2 despite an increase in accumulated maturing neutrophils.

371

372 In terms of the workflow, the clinically observed variability of ANC supported extending model  
373 simulation from a single median virtual patient to a virtual patient population. The DLBCL virtual cohort  
374 utilized in our simulations was validated comparing the cumulated distributions of the clinical and the  
375 virtual cohorts ANC at selected time points. This approach allowed for both qualitative and quantitative  
376 evaluation of equivalence of the two empirical cumulated distributions. An alternative and commonly  
377 adopted approach, like the visual predictive check, is conceptually similar in terms of comparing virtual  
378 vs clinical distributions, but it is more qualitative in nature.

379 The heterogeneity of the virtual population is observable in the simulated ANC profiles in terms of initial  
380 baseline, neutrophil reservoir pool size (ANC starts dropping from baseline level at different times), and  
381 idiosyncratic variability in response to maturation block (visible as overlapping profile in the recovery  
382 time interval). A limitation of the current implementation is that population PK was not included, as that  
383 would improve significantly the representation of the variability across the virtual population.

384 Model utility was demonstrated by simulating avadomide administration to a virtual DLBCL cohort.  
385 Since it was not possible to develop an avadomide efficacy module in absence of specific biomarkers or  
386 tumor suppression data, the drug exposure (i.e., AUC in central PK model compartment) is considered as  
387 a surrogate efficacy endpoint and here it is used as a reference to contrast schedule toxicity.

388 Simulation results address different aspects of neutropenia pattern modulation by choice of dosing  
389 schedule. Frequent dosing (i.e., schedules 28/28 and 5/7) produce high systemic exposure along with the  
390 highest incidence of neutropenia, compared to other schedules at same dose. It is also shown that two-day  
391 dosing holiday on the 5/7 schedule is sufficient to reduce significantly the total incidence of neutropenia  
392 in the virtual population (e.g., at the 4 mg dose, the schedule 5/7 compared to 28/28 gives ~28% less  
393 exposure, but it lowers incidence of neutropenia Grade 3 by ~44%). However, two-day holiday does not  
394 allow measurable recovery from high-grade neutropenia. This suggests that for avadomide in DLBCL  
395 patients a longer dosing holiday should be considered in case a more substantial recovery is desired. For  
396 example, compared to 5/7 and 28/28, all other tested schedules with measurable incidence of neutropenia  
397 enable substantial recovery (Figure 7). It is noted that the exploration of neutrophil recovery rate during  
398 dosing holiday is only possible with model-based tools since trial patients are typically undergoing  
399 sequential cycles of treatment and receive concomitant medications for the mitigation of neutropenia  
400 (such as G-CSF).

401 Regarding the analysis of prolonged high-grade neutropenia lasting at least seven consecutive days (7+  
402 day), among those schedules allowing dosing interruption (excluding 28/28), schedule 21/28 results in  
403 higher incidence of prolonged neutropenia, coherently with the 21-day continuous dosing not allowing for  
404 intermittent recovery. The schedule 5/7, despite some mitigation enabled by the two days of dosing  
405 interruption, produces a 7+ day neutropenia comparable to schedule 14/28. Schedule 7/14 shows the best  
406 performance in terms of minimizing 7+ day toxicity at dose level 4 to 6 mg. Further, results show that  
407 under continued dosing, the maximal neutropenia would be reached by day 21 (or a few days earlier),  
408 since the total incidence of high-grade neutropenia is nearly equivalent for schedule 21/28 and 28/28  
409 (Table II).

410 Finally, the model enables predictions of the time at which the most severe neutropenia is reached (i.e.  
411 ANC nadir, Figure 8), showing that nadir time is primarily controlled by the schedule of choice, rather  
412 than the dose level.

413 Collectively, these model-based results show that the choice of dose and schedule offers a powerful  
414 handle to modulate the neutropenia in terms of absolute incidence in the patient population, as well as the  
415 time of ANC nadir, duration of neutropenic state, and extent of recovery. These results demonstrate the  
416 model potential applicability as a support tool to inform decision making in the clinic. Simulation results  
417 should be interpreted in the light of clinical protocol definitions for dose limiting toxicity and maximum  
418 tolerated dose as well as efficacy considerations.

419

## 420 Conclusions

421 Neutropenia is a major treatment-emergent and dose-limiting toxicity in trial patients treated with  
422 avadomide. Intermittent dosing is an option to manage this toxicity and different combinations of dose  
423 and schedule enable controlling the toxicity-efficacy tradeoff. Here we presented a QSP model for  
424 avadomide-induced neutropenia, which includes a mechanistic model of neutrophil life cycle combined  
425 with avadomide PK and PD. The complete workflow allowed capturing the disease cohort variability and  
426 enabled performing simulations for several dosing schedule scenarios, aiming at screening options that  
427 would minimize neutropenia while enhancing drug exposure.

428 This model is the first developed specifically for neutropenia caused by block in neutrophil maturation  
429 and is validated on clinical data. We anticipate further opportunities to apply, develop and demonstrate  
430 the relevance of this model given potential use of avadomide and other CELMoD compounds either as  
431 single agents or in combination to treat a range of indications.

432

## 433 Acknowledgments

434 Yan Li (BMS) provided avadomide PK model. Fan Wu and Manisha Lamba (BMS) provided relevant  
435 feedback on model applicability and interpretation of results. Carla Guarinos, Alicia Benitez, Maria  
436 Dolores Jimenez, Estela G. Torano (BMS/CITRE) conducted *in vitro* experimental activity and provided  
437 relevant feedback on neutrophil maturation assay.

438

### 439 **Conflict of interest/disclosure:**

440 R.A.A., M.P., S.C., D.W.P., S.K., M.M., M.W.B.T., R.L., A.V.R declare employment at Bristol Myers  
441 Squibb.

442 M.P., S.C., D.W.P., S.K., M.M., M.W.B.T., R.L., C.C.S., A.V.R declare equity ownership in Bristol  
443 Myers Squibb.

444

### 445 **Contributions**

446 R.A.A., C.C.S., and A.V.R. designed the research. R.A.A. and C.C.S. performed data processing and  
447 formal analyses in consultation with all other authors. M.P., D.W.P., S.K., and S.C. provided clinical and  
448 translational insights. M.M. contributed to model design. M.W.B.T., R.L. provided support for project  
449 development and revised the manuscript. A.V.R. supervised the project and provided data analysis and  
450 modeling insights. R.A.A. and C.C.S. wrote the manuscript. All authors edited the final version of the  
451 manuscript.

452

### 453 **Funding statement**

454 The authors declare no funding related to the publication of this article.

455

## 456 Equations

$$457 \quad \frac{dProl}{dt} = k_{prol} \cdot FeedbackProliferation(Transit_2) \cdot Prol - k_{tr1} \cdot Prol \quad (1)$$

$$458 \quad \frac{dTransit_1}{dt} = k_{tr1} \cdot Prol - (k_{tr2} + k_d) \cdot Transit_1 \quad (2)$$

$$459 \quad \frac{dTransit_2}{dt} = k_{tr2} \cdot Transit_1 - \frac{V_{max} \cdot Effect_{MID} \cdot Transit_2}{K_M + Transit_2} - k_d \cdot Transit_2 \quad (3)$$

$$460 \quad \frac{dTransit_3}{dt} = \frac{V_{max} \cdot Effect_{MID} \cdot Transit_2}{K_M + Transit_2} - (k_{tr4} + k_d) \cdot Transit_3 \quad (4)$$

$$461 \quad \frac{dReserv}{dt} = k_{tr4} \cdot Transit_3 - (k_d + k_{out} \cdot FeedbackEgress(Circ)) \cdot Reserv \quad (5)$$

$$462 \quad \frac{dCirc}{dt} = k_{out} \cdot FeedbackEgress(Circ) \cdot Reserv - k_{elim} \cdot Circ \quad (6)$$

463

$$464 \quad FeedbackProliferation(Transit_2) = \left( \frac{Transit_2_{homoestatic}}{Transit_2} \right)^Y \quad (7)$$

$$465 \quad FeedbackEgress(Circ) = \left( \frac{Circ_{homoestatic}}{Circ} \right)^\beta \quad (8)$$

$$466 \quad Effect_{CC-122} = 1 - \frac{E_{max_{PD}} \cdot C_{CC-122}^{n_{PD}}}{EC50_{PD}^{n_{PD}} + C_{CC-122}^{n_{PD}}} \quad (9)$$

467

468

469

470

## 471 Bibliography

- 472 1. Hong CW. Current understanding in neutrophil differentiation and heterogeneity. Vol. 17,  
473 Immune Network. 2017. p. 298–306.
- 474 2. Hidalgo A, Chilvers ER, Summers C, Koenderman L. The Neutrophil Life Cycle. Trends  
475 Immunol. 2019;40(7):584–97.
- 476 3. Mortaz E, Alipoor SD, Adcock IM, Mumby S, Koenderman L. Update on Neutrophil Function in  
477 Severe Inflammation. Front Immunol. 2018;9:2171.
- 478 4. von Vietinghoff S, Ley K. Homeostatic Regulation of Blood Neutrophil Counts. J Immunol.  
479 2008;181(8):5183–8.
- 480 5. FDA. Guidance for Industry. Toxicity Grading Scale for Healthy Adult and Adolescent  
481 Volunteers Enrolled in Preventive Vaccine Clinical Trials [Internet]. 2007.
- 482 6. Moore DC. Drug-Induced Neutropenia: A Focus on Rituximab-Induced Late-Onset Neutropenia.  
483 P T. 2016;41(12):765–8.
- 484 7. Lopez-Girona A, Mendy D, Ito T, Miller K, Gandhi AK, Kang J, et al. Cereblon is a direct  
485 protein target for immunomodulatory and antiproliferative activities of lenalidomide and  
486 pomalidomide. Leukemia. 2012;26(11):2326–35.
- 487 8. Bjorklund CC, Kang J, Amatangelo M, Polonskaia A, Katz M, Chiu H, et al. Iberdomide (CC-  
488 220) is a potent cereblon E3 ligase modulator with antitumor and immunostimulatory activities in  
489 lenalidomide- and pomalidomide-resistant multiple myeloma cells with dysregulated CRBN.  
490 Leukemia. 2020;34(4):1197–201.
- 491 9. Rasco DW, Papadopoulos KP, Pourdehnad M, Gandhi AK, Hagner PR, Li Y, et al. A First-in-  
492 Human Study of Novel Cereblon Modulator Avadomide (CC-122) in Advanced Malignancies.  
493 Clin Cancer Res. 2019;25(1):90–8.
- 494 10. Sellars M. Ikaros in B cell development and function. World J Biol Chem. 2011;2(6):132.
- 495 11. Rebollo A, Schmitt C. Ikaros, Aiolos and Helios: transcription regulators and lymphoid  
496 malignancies. Immunol Cell Biol. 2003;81(3):171–5.
- 497 12. Hagner PR, Towfic F, Schmitz F, Wang X, Weng AP, Pourdehnad M, et al. Avadomide (CC-  
498 122) Alters T Cell Repertoire and Enhances Infiltration of Lymphocytes into Tumor  
499 Microenvironment in DLBCL Patients. Blood. 2018;132(Supplement 1):4211–4211.
- 500 13. Carpio C, Bouabdallah R, Ysebaert L, Sancho J-M, Salles G, Cordoba R, et al. Avadomide  
501 monotherapy in relapsed/refractory DLBCL: safety, efficacy, and a predictive gene classifier.  
502 Blood. 2020;135(13):996–1007.
- 503 14. Craig M. Towards Quantitative Systems Pharmacology Models of Chemotherapy-Induced  
504 Neutropenia. CPT Pharmacometrics Syst Pharmacol. 2017;6(5):293–304.
- 505 15. Evrard M, Kwok IWH, Chong SZ, Teng KWW, Becht E, Chen J, et al. Developmental Analysis  
506 of Bone Marrow Neutrophils Reveals Populations Specialized in Expansion, Trafficking, and  
507 Effector Functions. Immunity. 2018;48(2):364–379.e8.
- 508 16. Friberg LE, Henningsson A, Maas H, Nguyen L, Karlsson MO. Model of chemotherapy-induced  
509 myelosuppression with parameter consistency across drugs. J Clin Oncol. 2002;20(24):4713–21.
- 510 17. Quartino AL, Karlsson MO, Lindman H, Friberg LE. Characterization of endogenous G-CSF and  
511 the inverse correlation to chemotherapy-induced neutropenia in patients with breast cancer using  
512 population modeling. Pharm Res. 2014;31(12):3390–403.
- 513 18. Orr Y, Wilson DP, Taylor JM, Bannon PG, Geczy C, Davenport MP, et al. A kinetic model of  
514 bone marrow neutrophil production that characterizes late phenotypic maturation. Am J Physiol  
515 Integr Comp Physiol. 2007;292(4):R1707–16.
- 516 19. Christofferson G, Phillipson M. The neutrophil: one cell on many missions or many cells with  
517 different agendas? Cell Tissue Res. 2018;371(3):415–23.

- 518 20. Ng LG, Ostuni R, Hidalgo A. Heterogeneity of neutrophils. *Nat Rev Immunol*. 2019;19(4):255–  
519 65.
- 520 21. Bekkering S. Another look at the life of a neutrophil. *World J Hematol*. 2013;2(2):44.
- 521 22. Summers C, Rankin SM, Condliffe AM, Singh N, Peters AM, Chilvers ER. Neutrophil kinetics in  
522 health and disease. *Trends Immunol*. 2010;31(8):318–24.
- 523 23. Bai JPF, Earp JC, Pillai VC. Translational Quantitative Systems Pharmacology in Drug  
524 Development: from Current Landscape to Good Practices. *AAPS J*. 2019;21(4):1–13.
- 525 24. Sorger PK, Allerheiligen SRB, Abernethy DR, Altman RB, Brouwer KLR, Califano A, et al.  
526 Quantitative and Systems Pharmacology in the Post-genomic Era : New Approaches to  
527 Discovering Drugs and Understanding Therapeutic Mechanisms. QSP Work Gr. 2011;
- 528 25. Chis O-T, Banga JR, Balsa-Canto E. Structural Identifiability of Systems Biology Models: A  
529 Critical Comparison of Methods. Jaeger J, editor. *PLoS One*. 2011;6(11):e27755.
- 530 26. Villaverde AF, Barreiro A, Papachristodoulou A. Structural Identifiability of Dynamic Systems  
531 Biology Models. *PLoS Comput Biol*. 2016;12(10):e1005153.
- 532 27. Abbiati RA, Savoca A, Manca D. An engineering oriented approach to physiologically based  
533 pharmacokinetic and pharmacodynamic modeling. In: *Computer Aided Chemical Engineering*.  
534 2018. p. 37–63.
- 535 28. Kent E, Neumann S, Kummer U, Mendes P. What can we learn from global sensitivity analysis  
536 of biochemical systems? *PLoS One*. 2013;8(11):e79244.
- 537 29. Kirouac DC. How Do We “Validate” a QSP Model? *CPT pharmacometrics Syst Pharmacol*.  
538 2018;7(9):547–8.
- 539 30. Shampine LF, Reichelt MW. The MATLAB ODE Suite. *SIAM J Sci Comput*. 1997;18(1):1–22.
- 540 31. Lagarias JC, Reeds JA, Wright MH, Wright PE. Convergence Properties of the Nelder--Mead  
541 Simplex Method in Low Dimensions. *SIAM J Optim*. 1998;9(1):112–47.
- 542 32. Rothenberg TJ. Identification in Parametric Models. *Econometrica*. 1971;39(3):577.
- 543 33. Ligon TS, Fröhlich F, Chiş OT, Banga JR, Balsa-Canto E, Hasenauer J. GenSSI 2.0: multi-  
544 experiment structural identifiability analysis of SBML models. Wren J, editor. *Bioinformatics*.  
545 2018;34(8):1421–3.
- 546 34. Chiş O, Banga JR, Balsa-Canto E. GenSSI: a software toolbox for structural identifiability  
547 analysis of biological models. *Bioinformatics*. 2011;27(18):2610–1.
- 548 35. Balsa-Canto E, Alonso AA, Banga JR. An iterative identification procedure for dynamic  
549 modeling of biochemical networks. *BMC Syst Biol*. 2010;
- 550 36. Cho K-H, Shin S-Y, Kolch W, Wolkenhauer O. Experimental Design in Systems Biology, Based  
551 on Parameter Sensitivity Analysis Using a Monte Carlo Method: A Case Study for the TNF $\alpha$ -  
552 Mediated NF- $\kappa$  B Signal Transduction Pathway. *Simulation*. 2003;79(12):726–39.
- 553 37. Borregaard N. Neutrophils, from Marrow to Microbes. *Immunity*. 2010;33(5):657–70.
- 554 38. Geering B, Simon HU. Peculiarities of cell death mechanisms in neutrophils. Vol. 18, *Cell Death*  
555 *and Differentiation*. 2011. p. 1457–69.
- 556 39. Tak T, Tesselaar K, Pillay J, Borghans JAM, Koenderman L. What's your age again?  
557 Determination of human neutrophil half-lives revisited. *J Leukoc Biol*. 2013;94(4):595–601.
- 558 40. Dale DC, Liles WC, Llewellyn C, Rodger E, Price TH. Neutrophil transfusions: Kinetics and  
559 functions of neutrophils mobilized with granulocyte-colony-stimulating factor and  
560 dexamethasone. *Transfusion*. 1998;38(8):713–21.
- 561 41. Pillay J, den Braber I, Vrisekoop N, Kwast LM, de Boer RJ, Borghans JAM, et al. In vivo  
562 labeling with  $^2\text{H}_2\text{O}$  reveals a human neutrophil lifespan of 5.4 days. *Blood*. 2010;116(4):625–7.

- 563 42. Day RB, Link DC. Regulation of neutrophil trafficking from the bone marrow. *Cell Mol Life Sci.*  
564 2012;69(9):1415–23.
- 565 43. Kirouac DC, Cicali B, Schmidt S. Reproducibility of Quantitative Systems Pharmacology  
566 Models: Current Challenges and Future Opportunities. *CPT: Pharmacometrics and Systems*  
567 *Pharmacology*. 2019.
- 568
- 569
- 570
- 571
- 572



1 **Figures**

2

3 **Title:**

4 Quantitative systems pharmacology modeling of avadomide-induced neutropenia enables virtual clinical  
5 dose and schedule finding studies

6 **Authors:**

7 Roberto A. Abbiati<sup>1\*</sup>, Michael Pourdehnad<sup>2</sup>, Soraya Carrancio<sup>3</sup>, Daniel W. Pierce<sup>3</sup>, Shailaja Kasibhatla<sup>3</sup>,  
8 Mark McConnell<sup>4</sup>, Matthew W. B. Trotter<sup>1</sup>, Remco Loos<sup>1</sup>, Cristina C. Santini<sup>5</sup>, Alexander V. Ratushny<sup>4\*</sup>

9

10

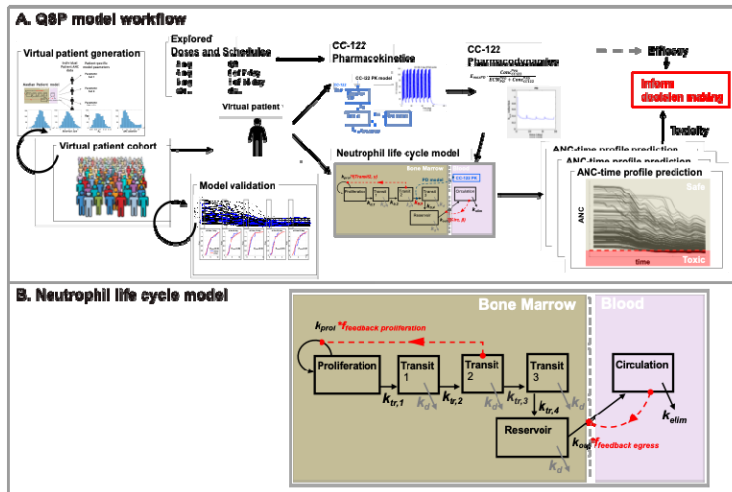

12

13 Figure 1. A: QSP model workflow. A virtual patient is represented as an appropriately parameterized model  
 14 describing the neutrophil life cycle. This model can be solved to generate simulations of neutrophil counts in blood  
 15 under homeostatic or avadomide-perturbed conditions. Avadomide effect is determined by the sequential evaluation  
 16 of PK, PD, and PD-driven alteration of the neutrophil maturation. Model simulations iterated for a large cohort of  
 17 virtual patients allow capturing the global pattern of neutropenia in the disease cohort under investigation. Finally,  
 18 simulation results are postprocessed to compute toxicity endpoints of interest.

19 B: compartmental structure of the neutrophil life cycle model. The proliferation pool represents committed  
 20 proliferative neutrophil precursors. From a model idealization standpoint, these cells have specific characteristics:  
 21 they can proliferate but not self-renew and can proceed to subsequent maturation stages, represented in the model as  
 22 a sequence of transit compartments. These compartments (i.e., Transit 1, Transit 2, and Transit 3) do not have a  
 23 direct biological counterpart but here are intended to capture the fact that progressive maturation implies a time-  
 24 delay, in line with previously published implementations of neutrophil maturation models. Once maturation is  
 25 completed, cells are stored in a bone marrow Reservoir pool, awaiting egress into peripheral blood circulation.  
 26 Circulation pool represents circulating neutrophils (i.e., level of neutrophils in blood, comparable to clinical ANC).  
 27 Finally, circulating neutrophils are subjected to terminal elimination (cell death).

28

29

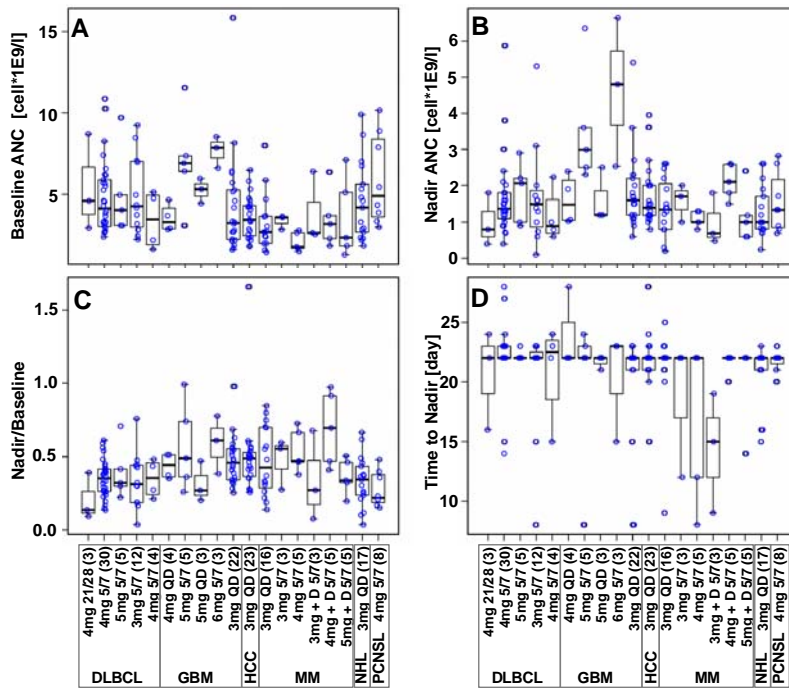

31

32 *Figure 2. Boxplots of ANC patterns for avadomide-treated patients in multiple disease cohorts. Blue dots show data*  
 33 *for individual patients. A: Average of available ANC measurements prior to treatment start; B: Lowest ANC*  
 34 *measured within first treatment cycle; C: Nadir normalized to baseline; D: Time of nadir (typically day 22, however*  
 35 *this result is conditioned by clinical sampling schedule, true value expected between days 16 and 28). Text boxes at*  
 36 *the bottom indicate disease cohorts, specific doses and schedules, and number of patients in parenthesis. For MM*  
 37 *cohort, "+D" label means avadomide + dexamethasone. NCT01421524 trial cohorts included patients with*  
 38 *Glioblastoma (GBM), Multiple Myeloma (MM), Diffuse Large B-Cell Lymphoma (DLBCL), Hepatocellular*  
 39 *Carcinoma (HCC) and Primary Central Nervous System Lymphoma (PCNSL). (References to related avadomide*  
 40 *clinical trial data and data processing details in Supplementary Materials 1.3).*

41

42

43

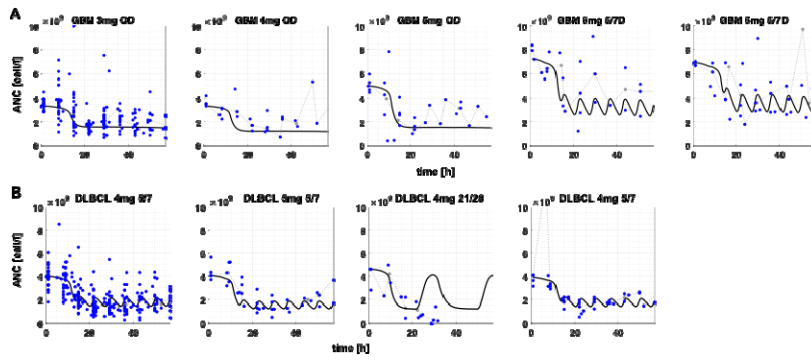

44

45 *Figure 3. A: Model best-fit to ANC data for all GBM dose groups; B: Model best-fit to ANC data for multiple DLBCL*  
46 *dose groups. Legend: Black-solid line: model fit; gray-dotted line: clinical ANC median profile; blue dots: individual*  
47 *(processed) clinical ANC. Schedules: QD=daily dosing; 5/7=5-days on, 2days-off; 21/28=21-days on, 7days-off.*

48

49

50

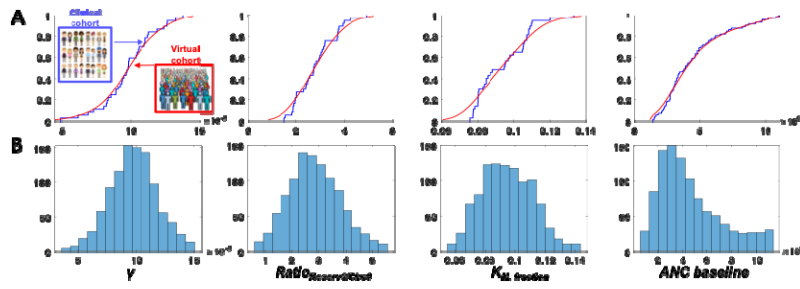

51

52 *Figure 4. Virtual cohort generation. A: cumulative empirical distributions for DLBCL fitted-parameter values (blue)*  
53 *vs probability density function estimates (red). B: histograms of final parameter value distributions for 1000 virtual*  
54 *patients.*

55

56

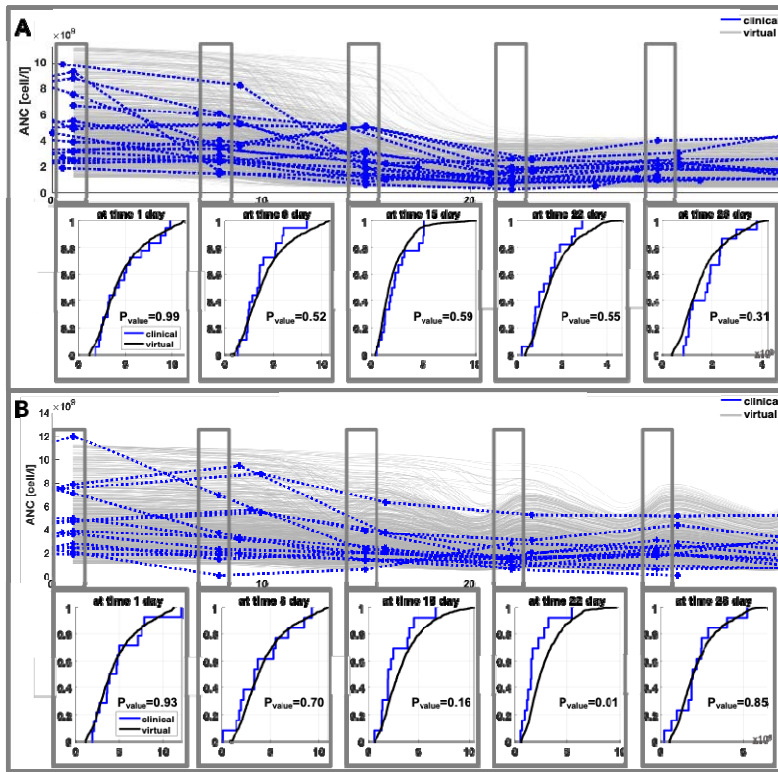

58

59 *Figure 5. Model validation results. A: Avadomide 3 mg QD. Top: longitudinal ANC profiles, virtual cohort (1000*  
 60 *subjects) = gray-solid, clinical cohort (18 patients) = blue-dotted. Bottom: K-S test for equivalence of cumulative*  
 61 *distribution profiles (with 5% significance level  $P_{value}$ ). B: Avadomide 3mg 5/7 day. Top: longitudinal ANC profiles,*  
 62 *virtual cohort (1000 subjects) = gray-solid, clinical cohort (14 patients) = blue-dotted. Bottom: K-S test for*  
 63 *equivalence of cumulative distribution profiles (with 5% significance level  $P_{value}$ ). Virtual and clinical ANC*  
 64 *distributions were taken at day 1, 8, 16, 22, and 28 and compared using the two sample K-S test. Distribution*  
 65 *equivalence rejected only for 3mg 5/7 at day 22 (i.e., equivalence verified at day 1, 8, 16, 28, but not at day 22).*

66

67

68

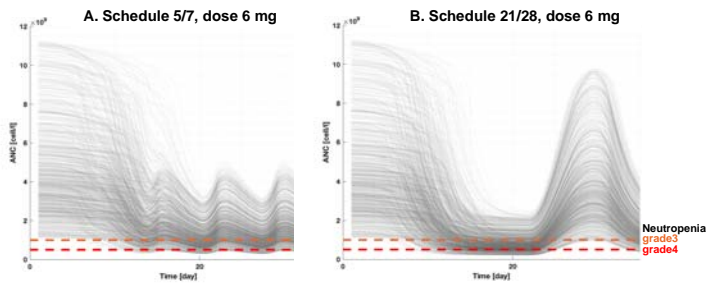

69

70 *Figure 6. Simulation of the same 1000 virtual patients for avadomide 6 mg on a 5/7 (A) or 21/28 (B) schedule.*  
71 *Neutropenia Grade 3 (orange) and 4 (red) are represented as horizontal dashed lines. The ANC baseline distribution*  
72 *(i.e., ANC at  $t=0$ ) is the same because the same virtual patients are simulated for both dosing schedules. The two*  
73 *schedules enable very similar PK exposure over the first treatment cycle; however, the neutropenia pattern is quite*  
74 *different: schedule 21/28 shows deeper ANC drop and protracted toxicity, followed by strong recovery once the*  
75 *treatment is interrupted. In contrast, schedule 5/7 offers a mitigated incidence of high-grade toxicity, with only*  
76 *limited recovery during dose interruption.*

77

78

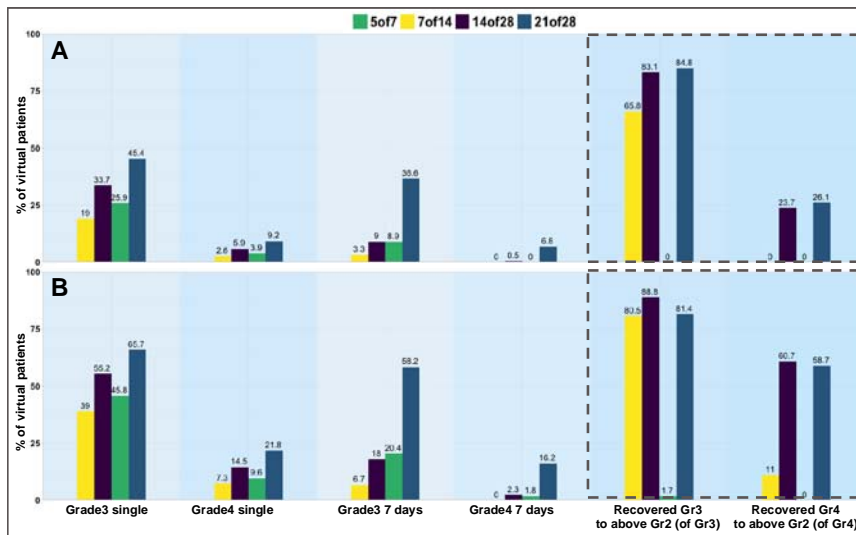

80

81 *Figure 7. Bar plot analysis for toxicity and recovery for different schedules at 4 mg (A) and 6 mg (B). Grade 3 and 4*  
 82 *single indicate percentage of virtual patients experiencing at least one event of neutrophil level below the respective*  
 83 *toxic threshold. Grade 3 and 4 7 days indicate percentage of virtual patients experiencing an extended and*  
 84 *uninterrupted toxicity for at least 7 days. Recovery Gr3 to above Gr2 and Gr4 to above Gr2 indicate the percentage*  
 85 *of patients that recovered to Grade 1 (i.e., above Grade 2) relative to the patients that experienced toxicity. This*  
 86 *analysis is limited to first treatment cycle.*

87

88



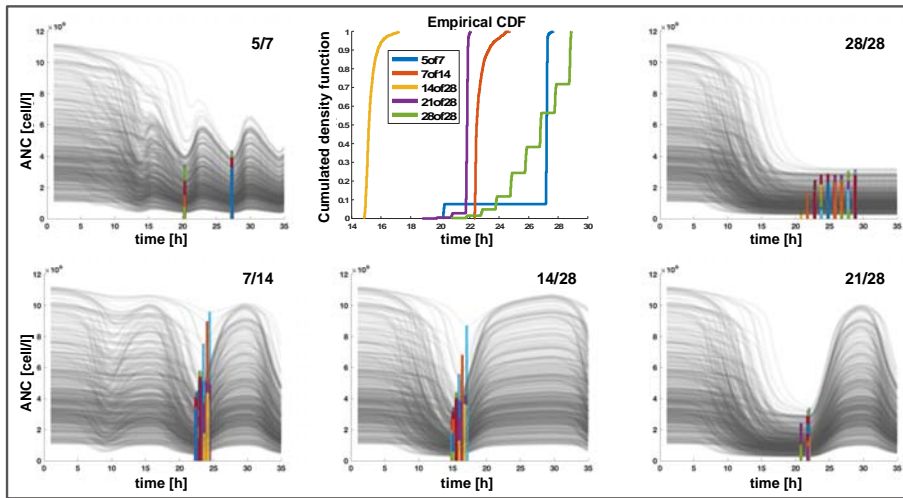

90

91 *Figure 8. Time of nadir across schedules. Central top panel shows the empirical cumulative distributions of the time*  
 92 *of occurrence of nadir for different schedules. Surrounding plots offer a visual justification for the observed nadir-*  
 93 *time pattern. These plots show longitudinal ANC profile for 500 virtual patients with graphical visualization of*  
 94 *individual nadirs by vertical-colored bars. Bar height depends on the individual ANC at nadir.*

95

96
